# Supplementary material for: Exploring tight junction alteration using double fluorescent probe combination of lanthanide complex with gold nanoclusters
Source: PubMed Central journal article supplement (PMC5004201; doi:10.1038/srep32218), 2016-08-30
Supplement: srep32218-s1.pdf [file srep32218-s1.pdf]

## Electronic Supplementary Information (ESI†)

### Exploring tight junction alteration using double fluorescent probe combination of lanthanide complex with gold nanoclusters‡

Xinyi Wang<sup>1,2‡</sup>, Na Wang<sup>1,4‡</sup>, Lan Yuan<sup>1</sup>, Na Li<sup>3</sup>, Junxia Wang<sup>5</sup>, Xiaoda Yang<sup>1\*</sup>

<sup>1</sup>Department of Chemical Biology, School of Pharmaceutical Sciences, Peking University, Beijing 100083, China.  
Fax: +86-10-62015584; Tel: +86-10-82801539; E-mail: xyang@bjmu.edu.cn

<sup>2</sup>College of Sciences, Shenyang Agricultural University, Shenyang 110161, China.

<sup>3</sup>Beijing National Laboratory for Molecular Sciences (BNLMS), The Key Laboratory of Bioorganic Chemistry and Molecular Engineering, Ministry of Education, College of Chemistry and Molecular Engineering, Peking University, Beijing 100871, China

<sup>4</sup>Department of Pharmacognosy, School of Pharmaceutical Sciences, Hebei Medical University, Shijiazhuang 050017, China

<sup>5</sup>Department of Molecular Biology, Hebei Key Lab of Laboratory Animal, Hebei Medical University, Shijiazhuang 050017, China

\* Corresponding author.

† Electronic supplementary information (ESI) available.

‡ These authors contributed equally to this work.

## **Materials**

MDCK (*Madin-Darby* canine kidney) cell was obtained from Institute of Materia Medica, Chinese Academy of Medical Sciences, Beijing. Dulbecco's modified Eagle's medium (DMEM), penicillin-streptomycin and fetal bovine serum (FBS) were from GIBCO, Invitrogen Corp. (Carlsbad, CA, USA). Transwell plates (12 wells, pore diameter of 3  $\mu\text{m}$ , polycarbonate) were from Corning Costar (Cambridge, MA).  $\text{Eu}_2\text{O}_3$  (99.99%), potassium hydrogen phthalate, and diethylenetriaminepentaacetic acid (DTPA) were from Sinopharm Chemical Reagent Corp (Beijing). Chloroauric acid ( $\text{HAuCl}_4$ ) and reduced glutathione (GSH) were purchased from Alfa Chemical (UK). Bovine serum albumin (BSA) was obtained from Sigma-Aldrich (Shanghai, China). Trioctyl phosphine oxide (TOPO) was from Sigma-Aldrich (St. Louis, MO, USA). The MTS tetrazolium compound was from Promega Corp. (Madison, WI, USA). All the other reagents were of analytical grade from commercial source.

## Characterization of Probes

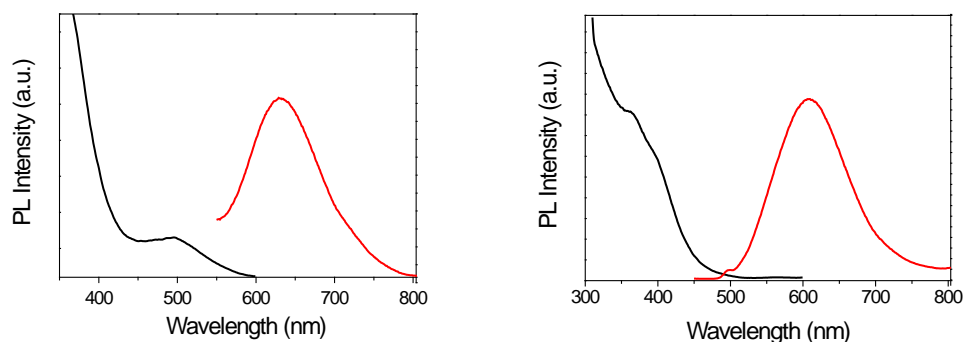

Figure S1. The fluorescence excitation (black lines) and emission (red lines) spectra of (a) AuNC@BSA ( $\lambda_{em} = 630$  nm for photoexcitation;  $\lambda_{ex} = 488$  nm for photoemission), (b) AuNC@GSH ( $\lambda_{em} = 608$  nm for photoexcitation;  $\lambda_{ex} = 405$  nm for photoemission).

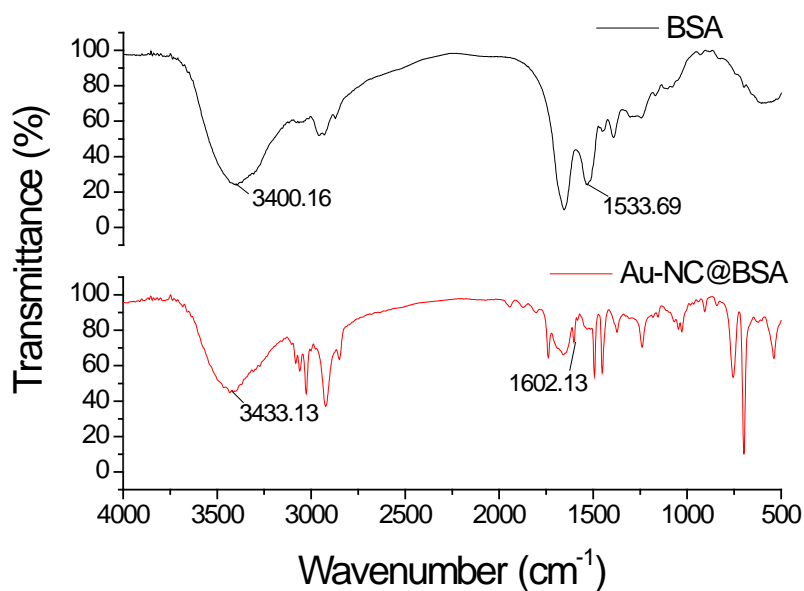

Figure S2. FT-IR spectra of BSA and Au-NCs@BSA. The peaks of  $3400.16\text{cm}^{-1}$  and  $1533.69\text{cm}^{-1}$  belong to the C-N stretching vibration and N-H bending vibration of BSA, respectively. The characteristic peak red-shift of BSA in Au-NC@BSA (increased by  $33\text{cm}^{-1}$  and  $69\text{cm}^{-1}$ ) indicating the existence of interaction between the amino and Au nanoclusters.

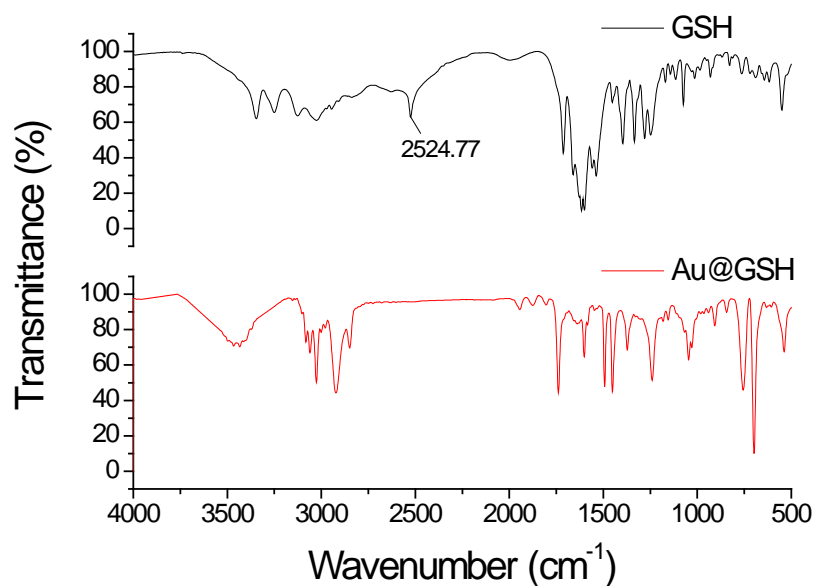

Figure S3. FT-IR spectra of GSH and Au-NCs@GSH. The S-H stretching vibration peak of GSH at  $2524.77\text{cm}^{-1}$  disappeared in the product of Au-NC@GSH indicating Au-S bond formation.

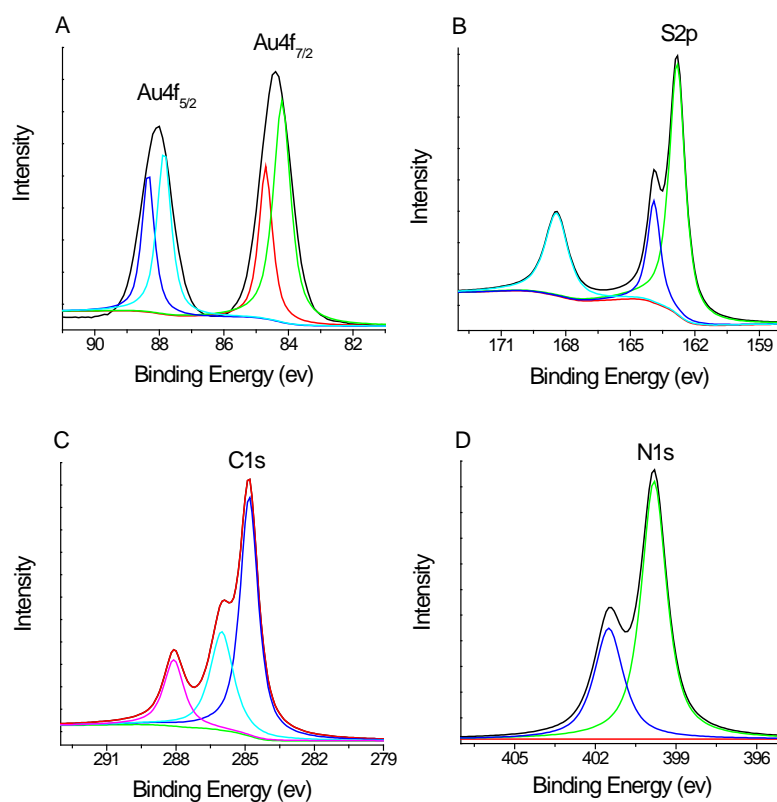

Figure S4. XPS spectra of Au-NC@GSH. (A) The Au  $4f_{7/2}$  spectrum could be divided into two distinct components (red and green curves) centered at binding energies of 84.2 eV and

84.7eV, assigned to Au (0) and Au (I), respectively; (B) the bond energy peak of 162.8 eV, 163.9 eV, 170.2eV corresponding to Au-S, S and S-oxide; (C) the bond energy peak 284.8 eV, 286.0 eV and 288.1eV corresponded to (-CH<sub>2</sub>-CH<sub>2</sub>-), (-CONH<sub>2</sub>) and (-COOH), respectively; (D) the bond energy peaks of 399.8eV and 401.5eV indicate the existence of (-NH) and (-NH<sub>3</sub><sup>+</sup>). Overall, XPS results indicate Au atoms and Au ions are included in Au-NC@GSH.

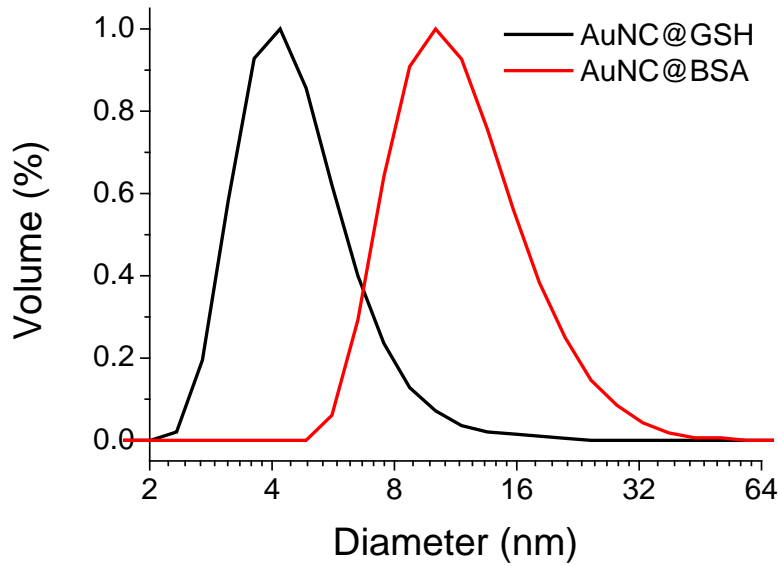

Figure S5. Size distributions of AuNC@GSH and AuNC@BSA dispersed in NF-DMEM culture media. Data were obtained by the dynamic light scattering (DLS) measurements.

### Estimation of $D_p$ values through $P_{app}$ values

The  $P_{app}$  values are proportional to the  $D_p$  values as described by the following equation:

$$P_{app} = D_p \cdot \frac{K_{m/f}}{h} = a \cdot D_p$$

Where  $h$  is thickness of the membrane and  $K_{m/f}$  is a constant for the membrane. Considering that under the condition of complete opening of tight junction (i.e. after treatment with 0.5 mmol/L EDTA),  $D_p$  would tend to be close to  $D_{AB}$ . Therefore, the scale factor  $a$  for a certain fluorescent probe can be estimated by the following equation:

$$a = \frac{P_{app, max} (EDTA \text{ treatment})}{D_{AB}}$$

Then the  $D_p$  values are estimated by the following equation:

$$D_p = \frac{P_{app}}{a}$$

### Size exclusion chromatography of Eu-DTPA and AuNCs

Eu-DTPA (2  $\mu$ M) and AuNCs (Au-NC@BSA, 1 mg/mL; Au-NC@GSH 0.8 mg/mL) were dissolved in NF-DMEM medium and applied to a Sephadex G25 column (0.5 mL, GE Health Care). The column was eluted with FF-DMEM medium and monitored per 100  $\mu$ L volume using a *Flexstation 3* microplate reader with a  $\lambda_{ex/em}$  of 340/616 nm and a measurement window from 600 to 1000 ms for Eu-DTPA, a  $\lambda_{ex/em}$  of 488/630 nm for Au-NC@BSA, and a  $\lambda_{ex/em}$  of 405/608 nm for Au-NC@GSH.

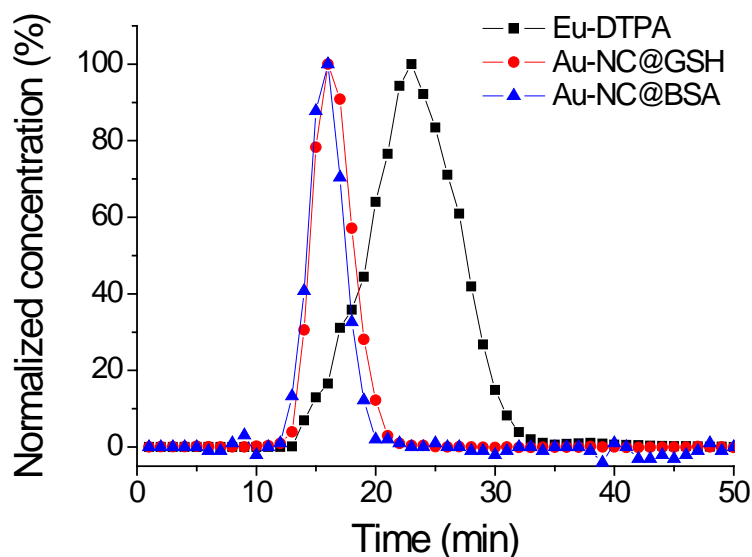

Figure S6. Chromatograms of Eu-DTPA , AuNC@GSH and AuNC@BSA.
